# Supplementary figures and images for: Modified CTAB and TRIzol protocols improve RNA extraction from chemically complex Embryophyta
Source: PubMed Central journal article supplement — Appl Plant Sci. 2015 May 13;3(5):apps.1400105. doi: 10.3732/apps.1400105 (PMC4435465; doi:10.3732/apps.1400105), 2015-05-13

Appendix S1. Distribution of Bioanalyzer metrics for total RNA extracted, RIN, and rRNA ratio.

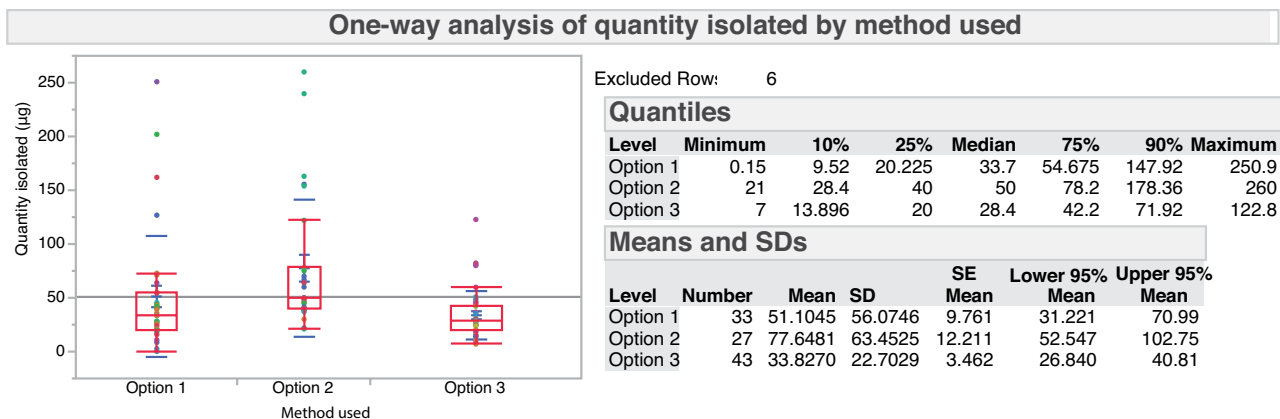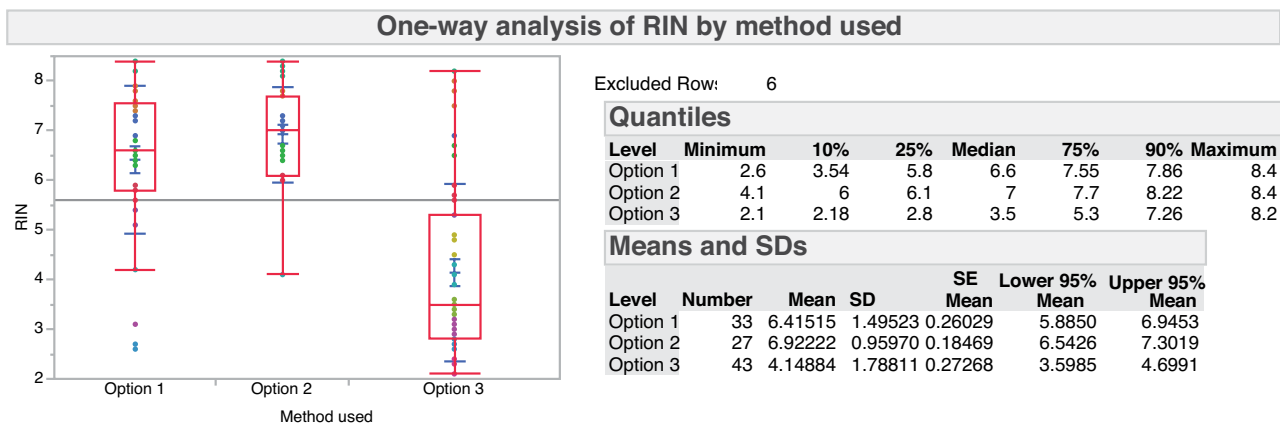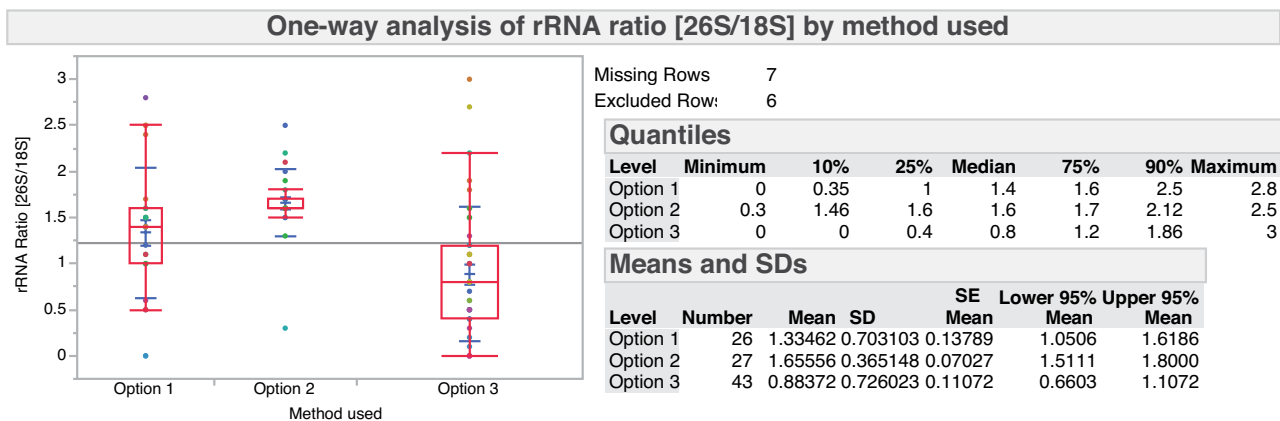

Supplement: apps.1400105_s1.pdf [file apps.1400105_s1.pdf]
